# Supplementary material
Source: PubMed Central journal article supplement (PMC5566540)
Supplement: 10.1074_M117.783860_jbc.M117.783860-1.pdf [file 10.1074_M117.783860_jbc.M117.783860-1.pdf]

**Supplementary Materials for**  
**Silencing of solute carrier family 13 member 5 disrupts energy homeostasis**  
**and inhibits proliferation of human hepatocarcinoma cells**

Zhihui Li<sup>1</sup>, Daochuan Li<sup>1</sup>, Eun Yong Choi<sup>2</sup>, Rena Lapidus<sup>2</sup>, Lei Zhang<sup>3</sup>, Shiew-Mei Huang<sup>3</sup>,  
Paul Shapiro<sup>1</sup>, and Hongbing Wang<sup>1</sup>

<sup>1</sup> Department of Pharmaceutical Sciences, University of Maryland School of Pharmacy.  
Baltimore, MD 21201; <sup>2</sup> Greenebaum Cancer Center, University of Maryland School of  
Medicine. Baltimore, MD 21201; <sup>3</sup> Office of Clinical Pharmacology, Center for Drug Evaluation  
and Research, FDA, Silver Spring, MD 20993.

**Corresponding Author:**

Hongbing Wang, Ph.D

Department of Pharmaceutical Sciences

University of Maryland School of Pharmacy

20 Penn Street, Baltimore, MD 21201

Telephone: (410)-706-1280

Fax: (410)-706-5017

E-mail: [hwang@rx.umaryland.edu](mailto:hwang@rx.umaryland.edu)

Figure S1

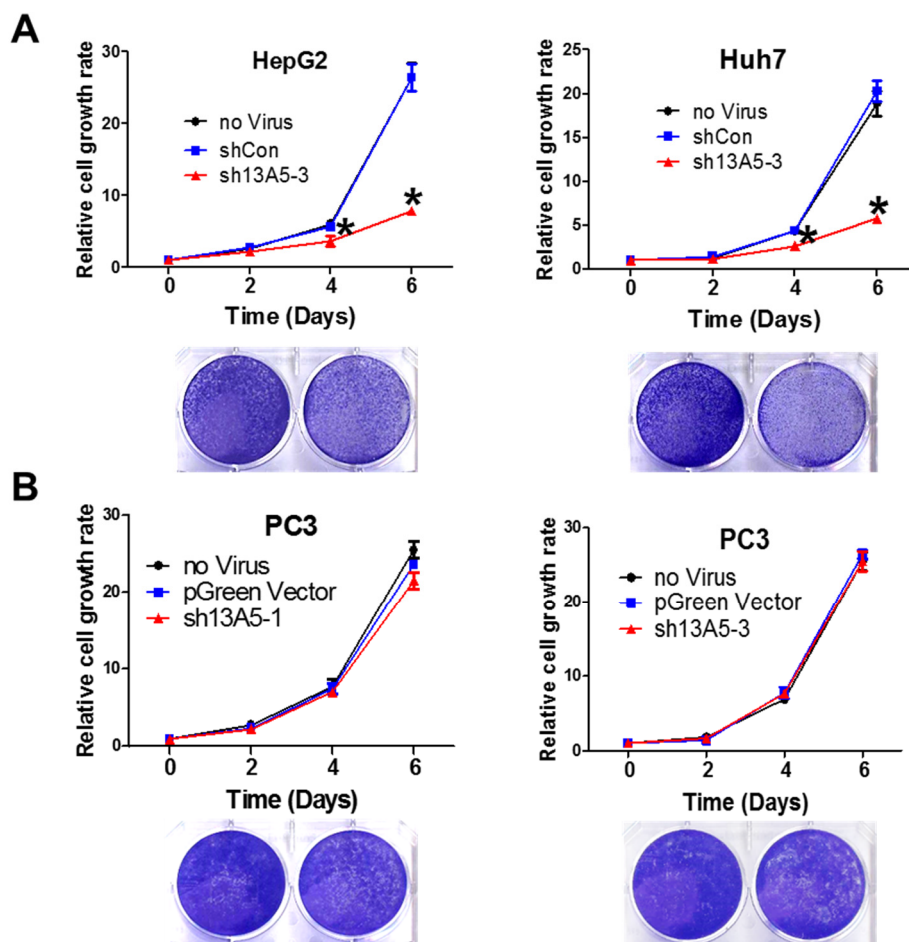

**Figure S1.** Knockdown of SLC13A5 suppresses the growth of HepG2 and Huh7 but not PC3 cells. Cultured HepG2, Huh7 or PC3 cells were transduced with lentivirus shRNA targeting different regions of SLCsh13A5-1 (GATCCGAGATCAACGTGCTGATCTGCTTCTCGAG-AAGCAGATCAGCACGTTGATCTCTTTTTG), sh13A5-3 (GATCCGGAGGGTGAGACA-AAGTATGTCTCGAGACATACTTTGTCTCACCTCCTTTTTG) or shCon. Relative cell growth rates were assayed using CCK-8 (Enzo Life Sciences, Inc.) as detailed in Materials and Methods at the indicated time points from *A*, HepG2 and Huh7, and *B*, PC3 cells. Results are expressed as mean  $\pm$  SD from three independent experiments. \*  $p < 0.05$ .

Figure S2

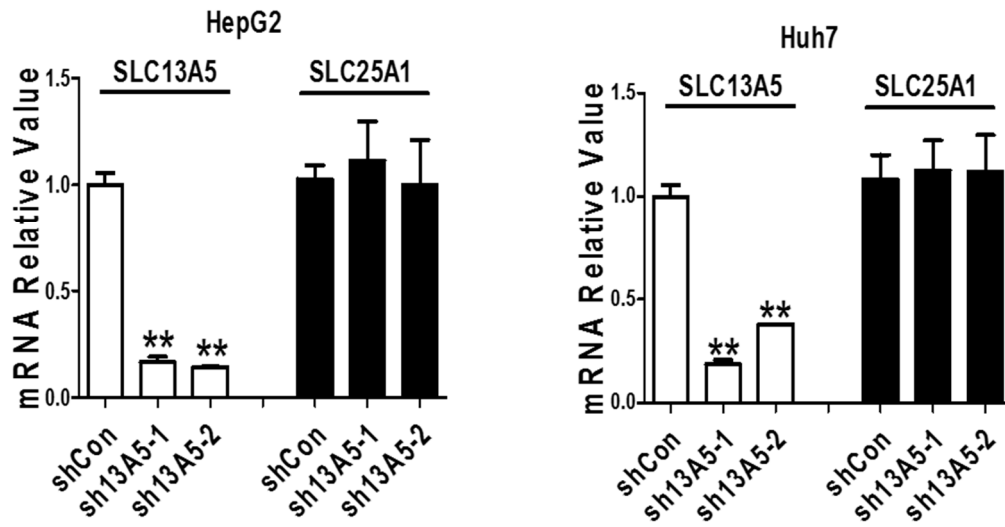

**Figure S2.** Knockdown of SLC13A5 does not influence the expression of SLC25A1 in HepG2 and Huh7 cells. Cultured HepG2 and Huh7 cells were transduced with lentivirus sh13A5-1, 13A5-2, or shCon as described in *Materials and Methods*. Relative mRNA expression of SLC13A5 and SLC25A1 in these cell lines was measured using real-time PCR. Results are expressed as mean  $\pm$  SD from three independent experiments. \*\*  $p < 0.01$ .

Figure S3

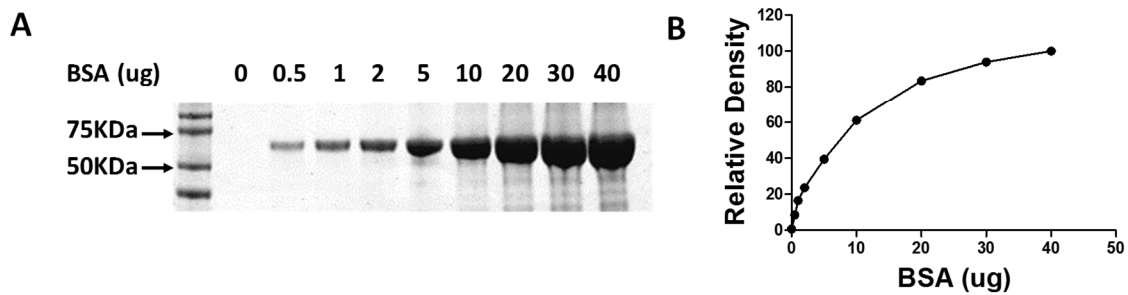

**Figure S3.** Bovine serum albumin (BSA) Coomassie blue staining curve. *A*, Serial dilutions of BSA on SDS-PAGE stained with coomassie blue. *B*, Densitometry curve of the BSA blot.

Densitometry was analyzed using NIH ImageJ software.

Figure S4

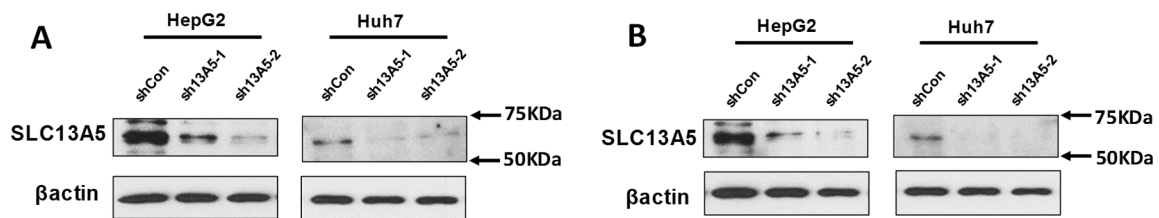

**Figure S4.** Knockdown of SLC13A5 expression. *A* and *B*, Expression of protein of SLC13A5 in HepG2 and Huh7 cells 72 h after SLC13A5 knockdown via lentivirus shRNA targeting different regions of SLC13A5 (sh13A5-1 and sh13A5-2). *A* and *B* are western blotting results from two independent experiment as replicates of Fig. 1B.

Figure S5

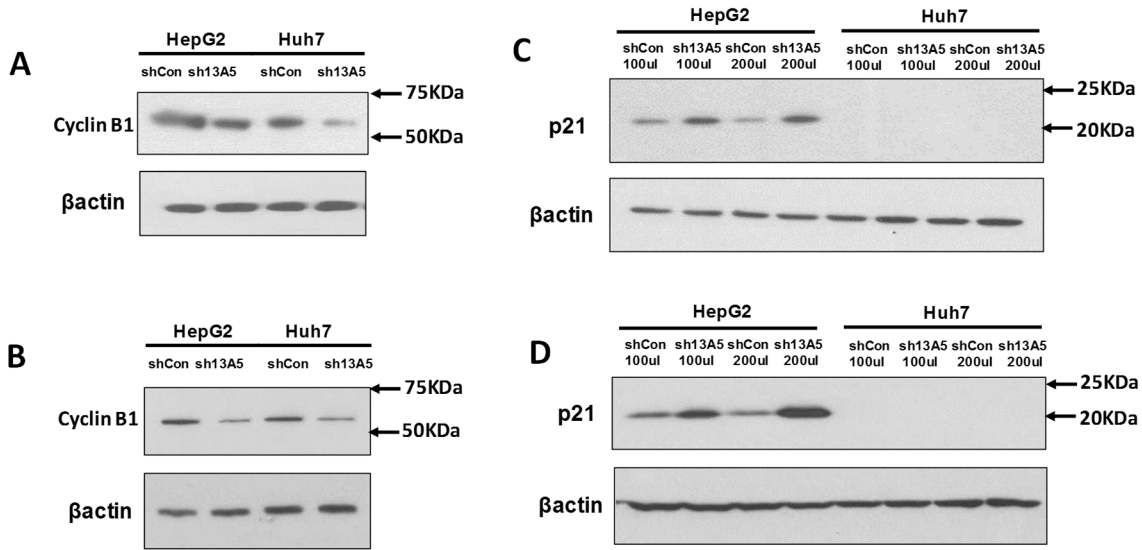

**Figure S5.** Knockdown of SLC13A5 inhibits cell cycle progression in HepG2 and Huh7 cells. *A* and *B*, Western blotting was carried out to measure the protein levels of Cyclin B1 in HepG2 and Huh7 cells infected with sh13A5 or shCon. *C* and *D*, Expression of p21 protein was measured in HepG2 and Huh7 cells infected with sh13A5 or shCon. *A* and *B* are western blotting results from two independent experiment as replicates of Fig. 2D; *C* and *D* are western blotting results from two independent experiment as replicates of Fig. 2F. The Cyclin B1 immunoblot shown in *A* is from the same samples shown in Fig. 4C and the  $\beta$ -actin immunoblot is duplicated to show equal loading.

Figure S6

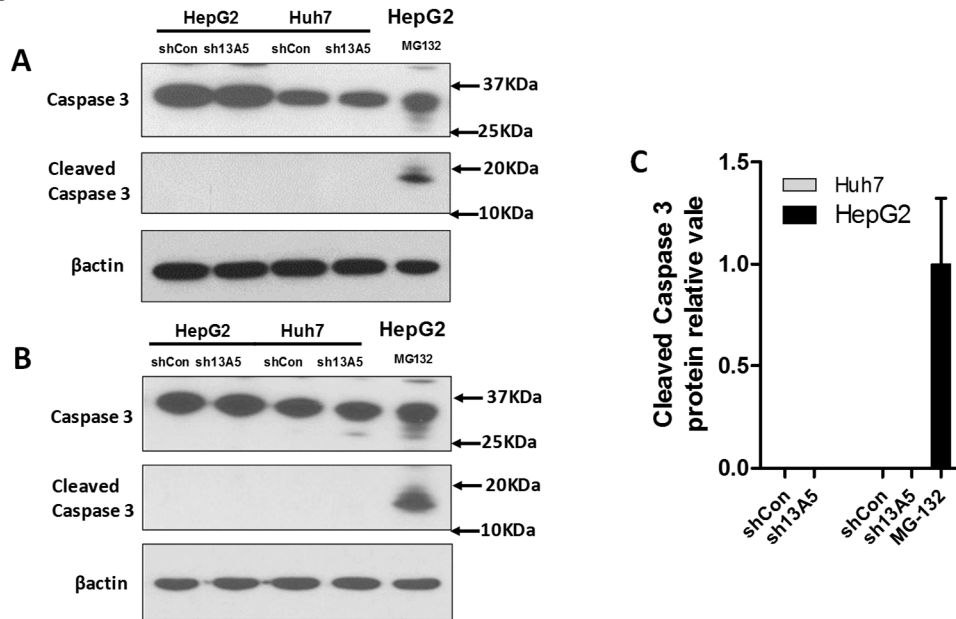

**Figure S6.** *A* and *B*, Caspase 3 activity was analyzed with Western blotting to detect the large fragment (17/19 kDa) of cleaved caspase 3 in HepG2 and Huh7 cells with or without SLC13A5 knockdown.  $\beta$  actin was used to normalize protein loading. *A* and *B* are western blotting results from two independent experiment as replicates of Fig. 3C. *C*, Densitometry analysis of the cleaved caspase 3 western blots of Fig. 3C, S6A, and S6B. Densitometry was analyzed using NIH ImageJ software.

Figure S7

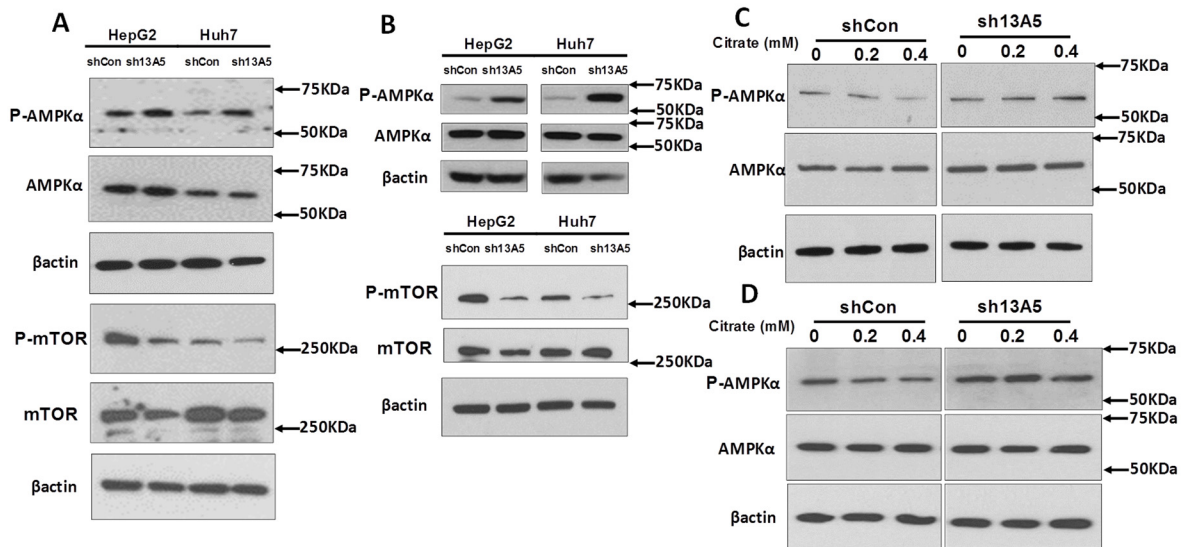

**Figure S7.** HepG2 and Huh7 cells were infected with lentivirus encoding the sh13A5 or shCon for 72 h. *A* and *B*, The protein levels of phospho-AMPK $\alpha$ , total AMPK $\alpha$ , phospho-mTOR, total mTOR, and  $\beta$  actin were analyzed by immunoblotting. *A* and *B* are western blotting results from two independent experiment as replicates of Fig. 4C. In separate experiments, Huh7 cells infected with sh13A5 or shCon for 72 h were treated with citrate at 0, 0.2, and 0.4 (mM) for another 24 h. *C* and *D*, the protein levels of phospho-AMPK $\alpha$ , total AMPK $\alpha$ , and  $\beta$  actin were subjected to immunoblotting analysis. *C* and *D* are western blotting results from two independent experiment as replicates of Fig. 4D.

Figure S8

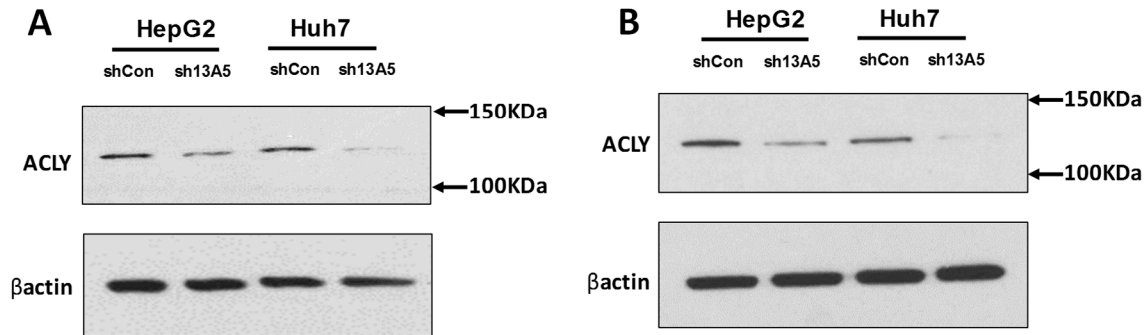

**Figure S8.** HepG2 and Huh7 cells were infected with lentivirus encoding the sh13A5 or shCon for 72 h. *A* and *B*, The protein levels of ACLY and  $\beta$  actin were measured using immunoblotting. *A* and *B* are western blotting results from two independent experiment as replicates of Fig. 5B.



Figure S9

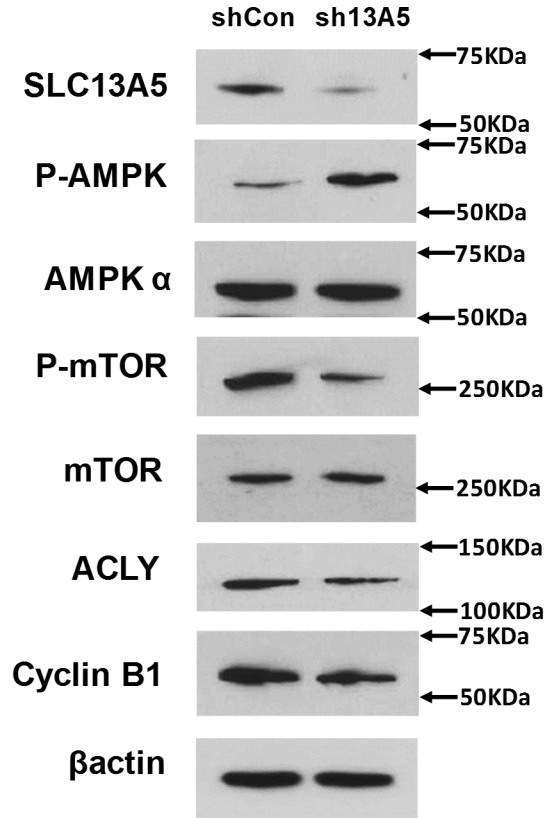

**Figure S9.** HepG2 cells were infected with lentivirus encoding sh13A5 or shCon. Four days after culture, equal number of HepG2-sh13A5 and HepG2-shCon cells were injected into the nude mice for xenograft formation as detailed in *Materials and Methods*. Western blotting was used to measure the protein expression of SLC13A5, p-AMPK $\alpha$ , total AMPK $\alpha$ , p-mTOR, total mTOR, ACLY, Cyclin B1 and  $\beta$ -actin.

Figure S10

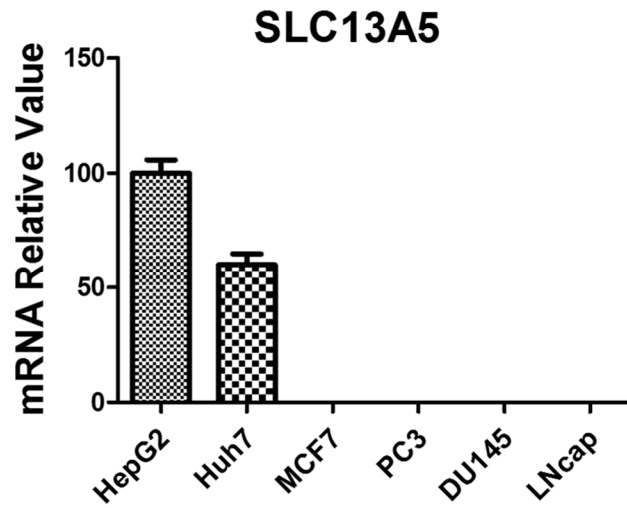

**Figure S10.** Expression of SLC13A5 in different human cancer cell lines. The relative expression levels of SLC13A5 were quantified using real-time PCR in HepG2, Huh7, MCF7, PC3, DU145, and LNCap cells.

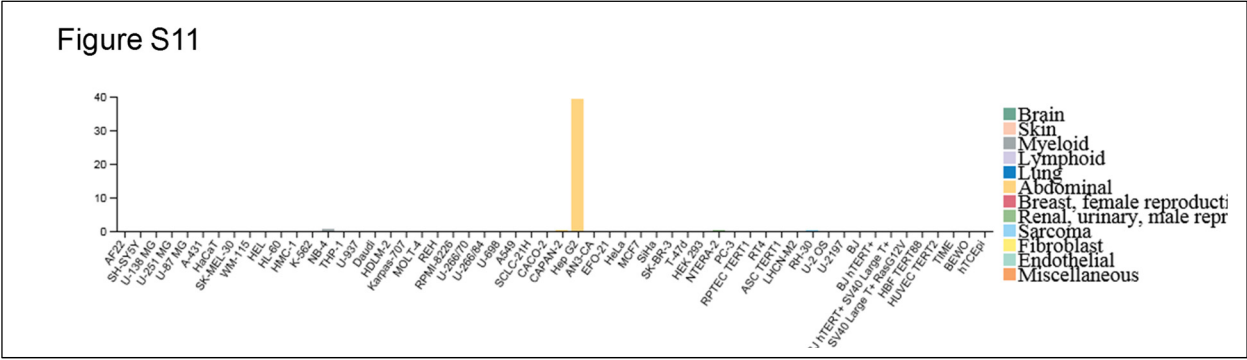

**Figure S11.** Expression of SLC13A5 in different human cancer cell lines extracted from <http://www.proteinatlas.org/ENSG00000141485-SLC13A5/cell>.

**Figure S12**

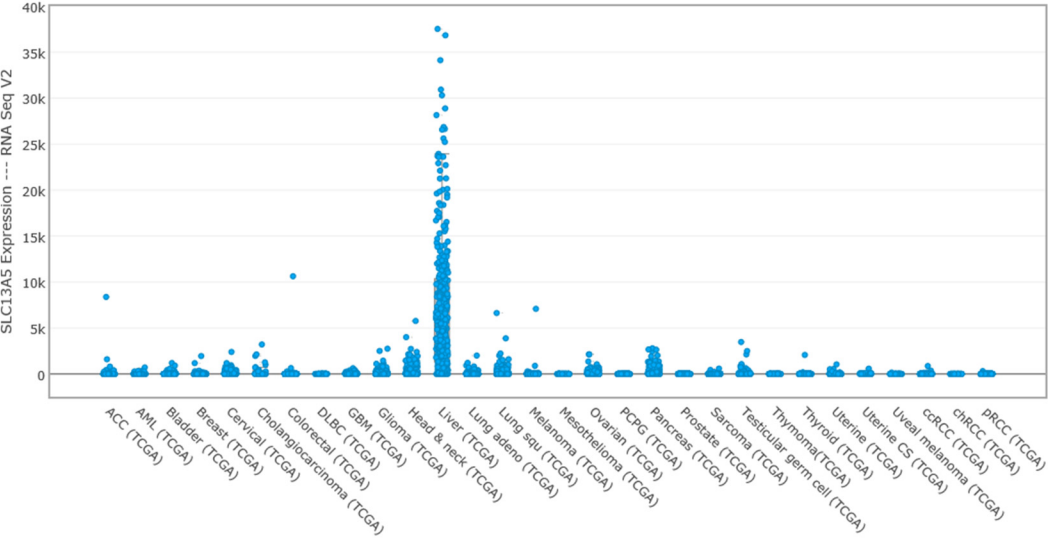

**Figure S12.** Expression of SLC13A5 in different human cancer tissue extracted from the cBioPortal database (<http://www.cbioportal.org/>)

**Supplemental Table S1: Primer sequences for real-time PCR.**

| Primer name | Sequence (5'-3')        |
|-------------|-------------------------|
| SLC13A5-F   | CTTTGTGGCCACCCTGCTATTC  |
| SLC13A5-R   | AGCAAATCCGCCCCCTAGTA    |
| Cyclin B1-F | TACCTATGCTGGTGCCAGTG    |
| Cyclin B1-R | CAGATGTTTCCATTGGGCTT    |
| ACLY-F      | TCAGGAGGGCTTACGGGTG     |
| ACLY-R      | TCTGTGCCAAAGACATGGATG   |
| P21-F       | CTGGAGACTCTCAGGGTCGAAA  |
| P21-R       | GATTAGGGCTTCCTCTTGGAGAA |
| B-actin-F   | GCTCGTCGTCGACAACGGCTC   |
| B-actin-R   | CAAACATGATCTGGGTCATCT   |
